# Supplementary material
Source: PubMed Central journal article supplement (PMC8428394)
Supplement: NIHMS1737555-supplement-Supplemental_Materials.pdf [file NIHMS1737555-supplement-Supplemental_Materials.pdf]

Supplemental Table 1. Participant Characteristics Stratified by Study Site

| Participant Characteristics                       | Iowa<br>(n=20) | Pittsburgh<br>(n=100) | p-value      |
|---------------------------------------------------|----------------|-----------------------|--------------|
| Age, mean years $\pm$ SD                          | 30.5 $\pm$ 4.3 | 31.2 $\pm$ 4.8        | 0.532        |
| Race, n(%)                                        |                |                       | 0.084        |
| Black                                             | 0 (0.0)        | 18 (18.0)             |              |
| White                                             | 19 (95.0)      | 75 (75.0)             |              |
| Other                                             | 1 (5.0)        | 7 (7.0)               |              |
| Education, n(%)                                   |                |                       | 0.630        |
| High school or less                               | 2 (10.0)       | 10 (10.0)             |              |
| Some college/associate degree                     | 6 (30.0)       | 21 (21.0)             |              |
| Bachelor's degree                                 | 6 (30.0)       | 25 (25.0)             |              |
| Graduate degree                                   | 6 (30.0)       | 44 (44.0)             |              |
| Parity, n(%)                                      |                |                       | 0.508        |
| Primipara                                         | 7 (35.0)       | 43 (43.0)             |              |
| Multipara                                         | 13 (65.0)      | 57 (57.0)             |              |
| Pregnancy history, n(%) <sup>a</sup>              |                |                       |              |
| Gestational hypertension                          | 1 (5.0)        | 4 (7.0)               |              |
| Preeclampsia                                      | 1 (5.0)        | 6 (10.7)              | 0.999        |
| Preterm birth                                     | 2 (10.0)       | 6 (10.5)              | 0.669        |
| Gestational diabetes                              | 2 (10.0)       | 3 (5.3)               | 0.277        |
| Prepregnancy BMI, mean kg/m <sup>2</sup> $\pm$ SD | 29.2 $\pm$ 5.6 | 26.3 $\pm$ 6.8        | 0.076        |
| Prepregnancy BMI category, n(%)                   |                |                       |              |
| Underweight (<18.5 kg/m <sup>2</sup> )            | 0 (0.0)        | 5 (5.0)               |              |
| Normal (18.5-24.9 kg/m <sup>2</sup> )             | 5 (25.0)       | 47 (47.0)             |              |
| Overweight (25.0-29.9 kg/m <sup>2</sup> )         | 4 (20.0)       | 24 (24.0)             |              |
| Obese ( $\geq$ 30.0 kg/m <sup>2</sup> )           | 11 (55.0)      | 24 (24.0)             |              |
| Gestational age at delivery, mean weeks $\pm$ SD  | 38.4 $\pm$ 1.2 | 39.2 $\pm$ 1.7        | 0.071        |
| SED trajectory groups, n(%)                       |                |                       | 0.268        |
| Low                                               | 5 (25.0)       | 20 (20.0)             |              |
| Moderate                                          | 4 (20.0)       | 39 (39.0)             |              |
| High                                              | 11 (55.0)      | 41 (41.0)             |              |
| MVPA trajectory groups, n(%)                      |                |                       | <b>0.026</b> |
| Low                                               | 11 (55.0)      | 24 (24.0)             |              |
| Moderate                                          | 7 (35.0)       | 52 (52.0)             |              |
| High                                              | 2 (10.0)       | 24 (24.0)             |              |
| Pregnancy outcomes                                |                |                       |              |
| All APOs, n(%) <sup>b</sup>                       | 8 (40.0)       | 19 (19.0)             | <b>0.040</b> |
| Hypertensive disorders, n(%)                      | 7 (35.0)       | 13 (13.0)             | <b>0.017</b> |
| Excessive GWG, n(%)                               | 11 (55.0)      | 49 (49.0)             | 0.684        |

Abbreviations: BMI = body mass index; SED = sedentary behavior; MVPA = moderate-to-vigorous-intensity physical activity; APO = adverse pregnancy outcomes; GWG = gestational weight gain.

Bolded values are statistically significant,  $p < 0.05$ .

<sup>a</sup>Among women with previous pregnancy and delivery (n=72).

<sup>b</sup>APOs include gestational hypertension, preeclampsia, gestational diabetes, foetal growth restriction, and preterm delivery.

Supplemental Table 2. Participant Characteristics Stratified by Sleep Efficiency Trajectory Groups<sup>a</sup>

| <b>Participant Characteristics</b>                | <b>Low Sleep Efficiency<br/>(n=20)</b> | <b>High Sleep Efficiency<br/>(n=100)</b> | <b>p-value</b> |
|---------------------------------------------------|----------------------------------------|------------------------------------------|----------------|
| Age, mean years $\pm$ SD                          | 29.7 $\pm$ 5.3                         | 31.3 $\pm$ 4.6                           | 0.161          |
| Race, n(%)                                        |                                        |                                          | <b>0.014</b>   |
| Black                                             | 6 (30.0)                               | 12 (12.0)                                |                |
| White                                             | 11 (55.0)                              | 83 (83.0)                                |                |
| Other                                             | 3 (15.0)                               | 5 (5.0)                                  |                |
| Education, n(%)                                   |                                        |                                          | <b>0.001</b>   |
| High school or less                               | 4 (20.0)                               | 8 (8.0)                                  |                |
| Some college/associate degree                     | 10 (50.0)                              | 17 (17.0)                                |                |
| Bachelor's degree                                 | 3 (15.0)                               | 28 (28.0)                                |                |
| Graduate degree                                   | 3 (15.0)                               | 47 (47.0)                                |                |
| Parity, n(%)                                      |                                        |                                          | 0.508          |
| Primipara                                         | 7 (35.0)                               | 43 (43.0)                                |                |
| Multipara                                         | 13 (65.0)                              | 57 (57.0)                                |                |
| Pregnancy history, n(%) <sup>b</sup>              |                                        |                                          |                |
| Gestational hypertension                          | 0 (0.0)                                | 5 (8.5)                                  | 0.577          |
| Preeclampsia                                      | 1 (7.7)                                | 6 (10.3)                                 | 1.000          |
| Preterm birth                                     | 3 (23.1)                               | 5 (8.5)                                  | 0.151          |
| Gestational diabetes                              | 0 (0.0)                                | 5 (6.9)                                  | 0.577          |
| Prepregnancy BMI, mean kg/m <sup>2</sup> $\pm$ SD | 29.5 $\pm$ 9.6                         | 26.2 $\pm$ 5.9                           | 0.147          |
| Prepregnancy BMI category, n(%)                   |                                        |                                          | 0.068          |
| Underweight (<18.5 kg/m <sup>2</sup> )            | 2 (10.0)                               | 3 (3.0)                                  |                |
| Normal (18.5-24.9 kg/m <sup>2</sup> )             | 5 (25.0)                               | 47 (47.0)                                |                |
| Overweight (25.0-29.9 kg/m <sup>2</sup> )         | 45 (20.0)                              | 26 (26.0)                                |                |
| Obese ( $\geq$ 30.0 kg/m <sup>2</sup> )           | 9 (45.0)                               | 24 (24.0)                                |                |
| Gestational age at delivery, mean weeks $\pm$ SD  | 39.1 $\pm$ 1.0                         | 39.0 $\pm$ 1.8                           | 0.793          |
| SED trajectory groups, n(%)                       |                                        |                                          | 0.069          |
| Low                                               | 8 (40.0)                               | 17 (17.0)                                |                |
| Moderate                                          | 4 (20.0)                               | 39 (39.0)                                |                |
| High                                              | 8 (40.0)                               | 44 (44.0)                                |                |
| MVPA trajectory groups, n(%)                      |                                        |                                          | 0.363          |
| Low                                               | 7 (35.0)                               | 28 (28.0)                                |                |
| Moderate                                          | 7 (35.0)                               | 52 (52.0)                                |                |
| High                                              | 6 (30.0)                               | 20 (20.0)                                |                |
| Pregnancy outcomes                                |                                        |                                          |                |
| All APOs, n(%) <sup>c</sup>                       | 3 (15.0)                               | 24 (24.0)                                | 0.559          |
| Hypertensive disorders, n(%)                      | 2 (10.0)                               | 18 (18.0)                                | 0.521          |
| Excessive GWG, n(%)                               | 13 (68.4)                              | 47 (47.0)                                | 0.133          |

Abbreviations: BMI = body mass index; SED = sedentary behavior; MVPA = moderate-to-vigorous-intensity physical activity; APO = adverse pregnancy outcomes; GWG = gestational weight gain.

Bolded values are statistically significant,  $p < 0.05$ .

<sup>a</sup>Sleep efficiency groups created using latent trajectories.

<sup>b</sup>Among women with previous pregnancy and delivery ( $n=72$ ).

<sup>c</sup>APOs include gestational hypertension, preeclampsia, gestational diabetes, foetal growth restriction, and preterm delivery.

Supplemental Table 3. Participant Characteristics Stratified by Sleep Quality Trajectory Groups<sup>a</sup>

| Participant Characteristics                   | Poor Sleep Quality (n=18) | Worsening Sleep Quality (n=28) | Good Sleep Quality (n=74) | p-value          |
|-----------------------------------------------|---------------------------|--------------------------------|---------------------------|------------------|
| Age, mean years ± SD                          | 30.7 ± 6.1                | 30.8 ± 4.3                     | 31.2 ± 4.6                | 0.881            |
| Race, n(%)                                    |                           |                                |                           |                  |
| Black                                         | 5 (27.8)                  | 3 (10.7)                       | 10 (13.5)                 | 0.162            |
| White                                         | 11 (61.1)                 | 25 (89.3)                      | 58 (78.4)                 |                  |
| Other                                         | 2 (11.1)                  | 0 (0.0)                        | 6 (8.1)                   |                  |
| Education, n(%)                               |                           |                                |                           | <b>&lt;0.001</b> |
| High school or less                           | 3 (16.7)                  | 5 (17.9)                       | 4 (5.4)                   |                  |
| Some college/associate degree                 | 10 (55.6)                 | 7 (25.0)                       | 10 (13.5)                 |                  |
| Bachelor's degree                             | 1 (5.6)                   | 8 (28.6)                       | 22 (29.7)                 |                  |
| Graduate degree                               | 4(22.2)                   | 8 (28.6)                       | 38 (51.4)                 |                  |
| Parity, n(%)                                  |                           |                                |                           | 0.678            |
| Primipara                                     | 6 (33.3)                  | 13 (46.4)                      | 39 (88.6)                 |                  |
| Multipara                                     | 12 (66.7)                 | 15 (53.6)                      | 5 (11.4)                  |                  |
| Pregnancy history, n(%) <sup>b</sup>          |                           |                                |                           |                  |
| Gestational hypertension                      | 0 (0.0)                   | 0 (0.0)                        | 5 (11.4)                  | 0.336            |
| Preeclampsia                                  | 1 (8.3)                   | 0 (0.0)                        | 6 (13.6)                  | 0.389            |
| Preterm birth                                 | 2 (16.7)                  | 0 (0.0)                        | 6 (13.6)                  | 0.241            |
| Gestational diabetes                          | 0 (0.0)                   | 1 (6.3)                        | 4 (9.1)                   | 0.818            |
| Prepregnancy BMI, mean kg/m <sup>2</sup> ± SD | 29.8 ± 10.0               | 27.3 ± 5.8                     | 25.8 ± 5.9                | 0.076            |
| Prepregnancy BMI category, n(%)               |                           |                                |                           | 0.066            |
| Underweight (<18.5 kg/m <sup>2</sup> )        | 2 (11.1)                  | 1 (3.6)                        | 2 (2.7)                   |                  |
| Normal (18.5-24.9 kg/m <sup>2</sup> )         | 6 (33.3)                  | 10 (35.7)                      | 36 (48.7)                 |                  |
| Overweight (25.0-29.9 kg/m <sup>2</sup> )     | 2 (11.1)                  | 6 (21.4)                       | 22 (29.7)                 |                  |
| Obese (≥30.0 kg/m <sup>2</sup> )              | 8 (44.4)                  | 11 (39.3)                      | 14 (18.9)                 |                  |
| Gestational age at delivery, mean weeks ± SD  | 39.1 ± 1.9                | 39.2 ± 1.4                     | 38.6 ± 0.9                | 0.398            |
| SED trajectory groups, n(%)                   |                           |                                |                           | 0.078            |
| Low                                           | 5 (27.8)                  | 8 (28.6)                       | 12 (16.2)                 |                  |
| Moderate                                      | 3 (16.7)                  | 13 (46.4)                      | 27 (36.5)                 |                  |
| High                                          | 10 (55.6)                 | 7 (25.0)                       | 35 (47.3)                 |                  |
| MVPA trajectory groups, n(%)                  |                           |                                |                           | 0.228            |
| Low                                           | 7 (38.9)                  | 12 (42.9)                      | 16 (21.6)                 |                  |
| Moderate                                      | 7 (38.9)                  | 11 (39.3)                      | 41 (55.4)                 |                  |
| High                                          | 4 (22.2)                  | 5 (17.9)                       | 17 (23.0)                 |                  |
| Pregnancy outcomes                            |                           |                                |                           |                  |
| All APOs, n(%) <sup>c</sup>                   | 4 (22.2)                  | 6 (21.4)                       | 17 (23.0)                 | 0.986            |
| Hypertensive disorders, n(%)                  | 3 (16.7)                  | 5 (18.5)                       | 12 (16.2)                 | 0.939            |
| Excessive GWG, n(%)                           | 12 (66.7)                 | 18 (66.7)                      | 30 (41.1)                 | <b>0.026</b>     |

Abbreviations: BMI = body mass index; SED = sedentary behavior; MVPA = moderate-to-vigorous-intensity physical activity; APO = adverse pregnancy outcomes; GWG = gestational weight gain.

<sup>a</sup>Sleep quality trajectory groups created using using latent trajectories.

<sup>b</sup>Among women with previous pregnancy and delivery (n=72).

<sup>c</sup>APOs include gestational hypertension, preeclampsia, gestational diabetes, fetal growth restriction, and preterm delivery.

Supplemental Table 4. Associations of Sleep Measures with Adverse Pregnancy Outcomes with Additional Adjustment for SED and MVPA Trajectories

|                                            | <b>All APOs<br/>(n=27)</b> | <b>Hypertensive<br/>Disorders<br/>(n=20)</b> | <b>Excessive GWG<br/>(n=60)</b> |
|--------------------------------------------|----------------------------|----------------------------------------------|---------------------------------|
| <b>Sleep Trajectory Groups<sup>a</sup></b> | <b>OR (95% CI)</b>         | <b>OR (95% CI)</b>                           | <b>OR (95% CI)</b>              |
| Sleep duration                             |                            |                                              |                                 |
| Short                                      | 1.07 (0.29, 3.95)          | 1.60 (0.34, 7.62)                            | 0.96 (0.31, 2.94)               |
| Adequate                                   | Reference                  | Reference                                    | Reference                       |
| Sleep efficiency                           |                            |                                              |                                 |
| Low                                        | 1.56 (0.35, 7.02)          | 1.69 (0.28, 10.15)                           | 0.46 (0.14, 1.56)               |
| High                                       | Reference                  | Reference                                    | Reference                       |
| Sleep quality                              |                            |                                              |                                 |
| Good                                       | Reference                  | Reference                                    | Reference                       |
| Worsening                                  | 0.87 (0.26, 2.85)          | 0.67 (0.17, 2.64)                            | <b>0.30 (0.10, 0.87)</b>        |
| Poor                                       | 1.51 (0.36, 6.40)          | 1.30 (0.27, 6.34)                            | 0.42 (0.12, 1.41)               |

Abbreviations: SED = sedentary behavior; MVPA = moderate-to-vigorous intensity physical activity; APO = adverse pregnancy outcomes; GWG = gestational weight gain.

Models adjusted for site, age, race (black vs. non-black), parity (primipara vs. multipara), pre-pregnancy BMI (continuous), gestational age at delivery (excessive GWG model only), SED trajectory, and MVPA trajectory. Bolded values are statistically significant, p<0.05.

<sup>a</sup>Sleep trajectory groups created using latent trajectories.
